# Supplementary material for: A durable and fast-responsive photochromic and switchable luminescent polyviologen–polyoxometalate hybrid
Source: Royal Society of Chemistry journal article supplement (doi:10.1039/c5tc03270a), 2015-01-01
Supplement: c5tc03270a1.pdf [file c5tc03270a1.pdf]

## Supporting Information

### **Durable and fast-response photochromic and switchable luminescent polyviologen-polyoxometalate hybrid**

De-Feng Shen,<sup>a</sup> Si Li,<sup>a</sup> Hong Liu,<sup>a\*</sup> Wei Jiang,<sup>c</sup> Qiang Zhang,<sup>b\*</sup> and Guang-  
Gang Gao<sup>a,d\*</sup>

<sup>a</sup> *Department of Chemistry, University of Jiamusi, Jiamusi, Heilongjiang, China. E-mail: gaogg@jmsu.edu.cn (G. G. Gao); hliu@jmsu.edu.cn (H. Liu)*

<sup>b</sup> *School of Public Health, Jiamusi University, Jiamusi, China. E-mail: zhangqiang@jmsu.edu.cn (Q. Zhang)*

<sup>c</sup> *Dalian Environmental Monitoring Center, Dalian, China. (W. Jiang)*

<sup>d</sup> *Department of Chemistry, Changchun Normal University, Changchun, China. (G. G. Gao)*

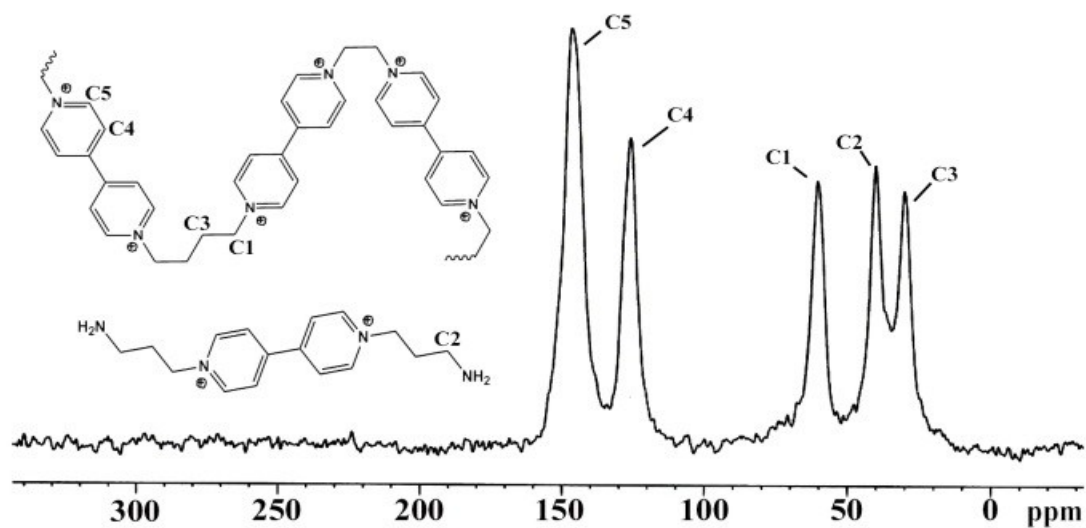

**Figure S1.** The solid state  $^{13}\text{C}$  CP-MAS NMR of complex **1**.

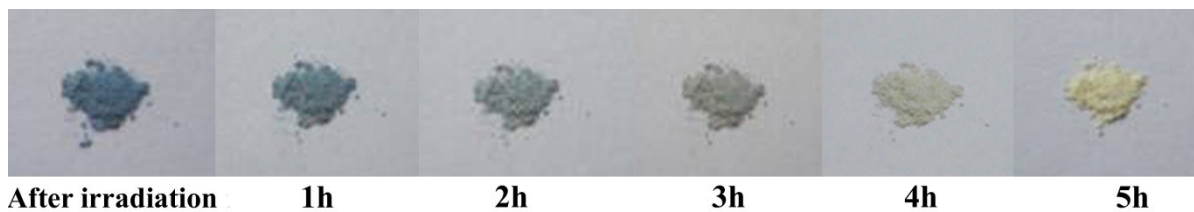

**Figure S2.** The color recovery process of complex **1** after 1, 2, 3, 4 and 5h in a dark box in air.

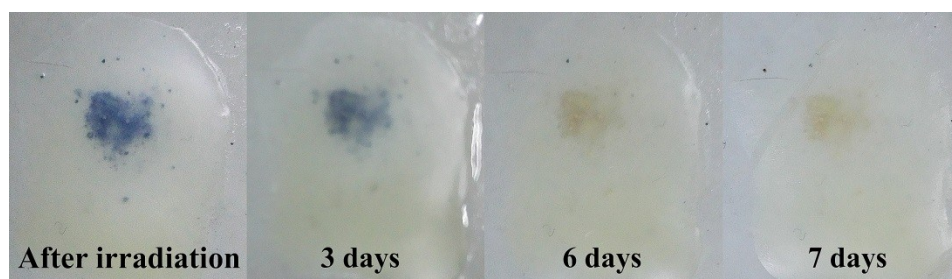

**Figure S3.** The color recovery process of complex **1** after 3, 6 and 7 days in a dark box in air. Complex **1** was wrapped by vaseline.

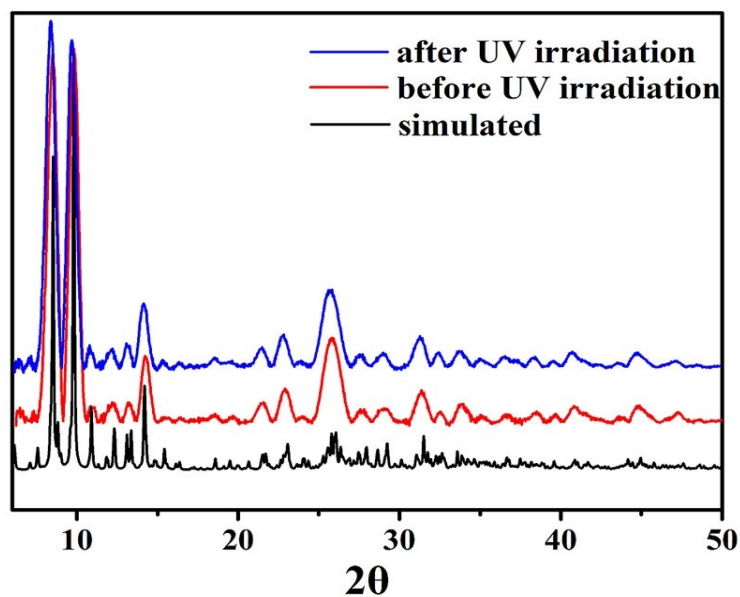

**Figure S4.** PXRD patterns of complex **1** before (red) and after (blue) UV irradiation with 300 W Hg lamp at room temperature in air for 30 min. The black line is simulated curve.

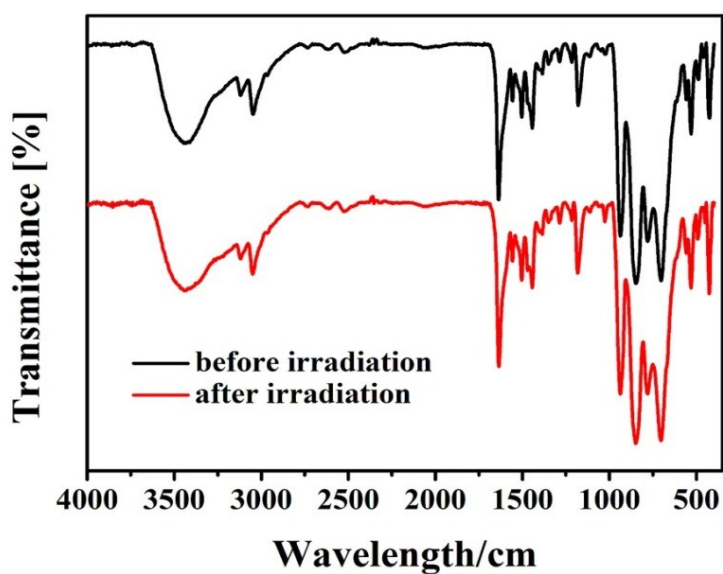

**Figure S5.** FTIR spectra of complex **1** before (black) and after (red) UV irradiation with 300W Hg lamp at room temperature in air for 5 min.

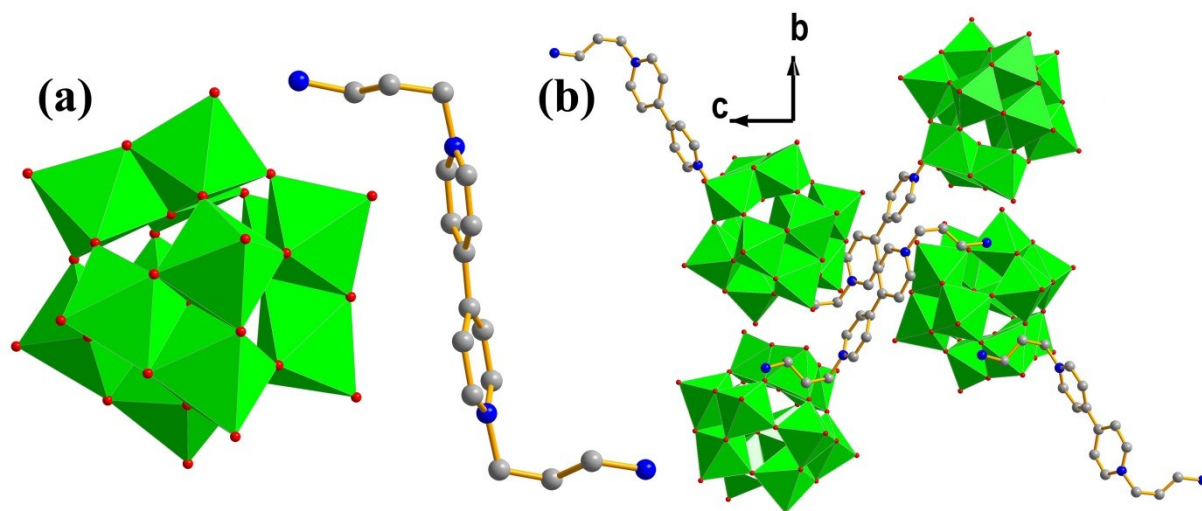

**Figure S6** (a) A ball-and-stick and polyhedral combined view of complex **2**. (b) Packing diagram of complex **2** along *a* axis. Color code: C, gray; N, blue; O, brown. The isolated water molecules are omitted for clarity.

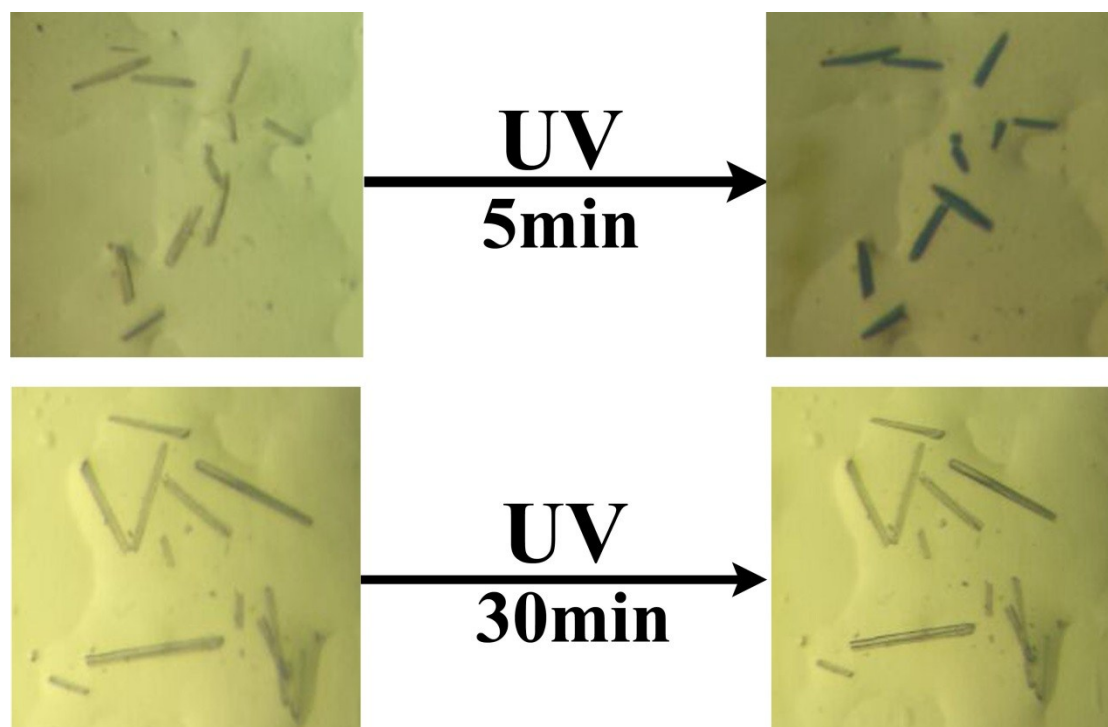

**Figure S7** The photos of crystals **1** (top) and **2** (bottom) were recorded before irradiation (left) and after irradiation (right) by 300 W Hg lamp at room temperature in air.

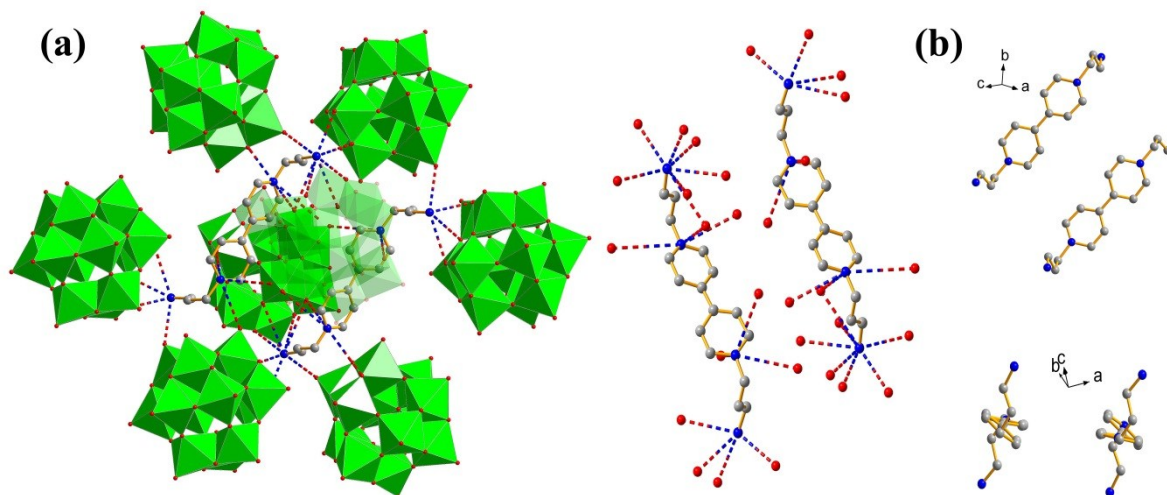

**Figure S8** (a) A view of the weak interactions between  $AV^{2+}$  monomers and  $Na_6[H_2W_{12}O_{40}] \cdot 20H_2O$ . (b) The arrangement of  $AV^{2+}$  monomers. Color code: C, gray; N, blue; O, red. Isolated water molecules are omitted for clarity.

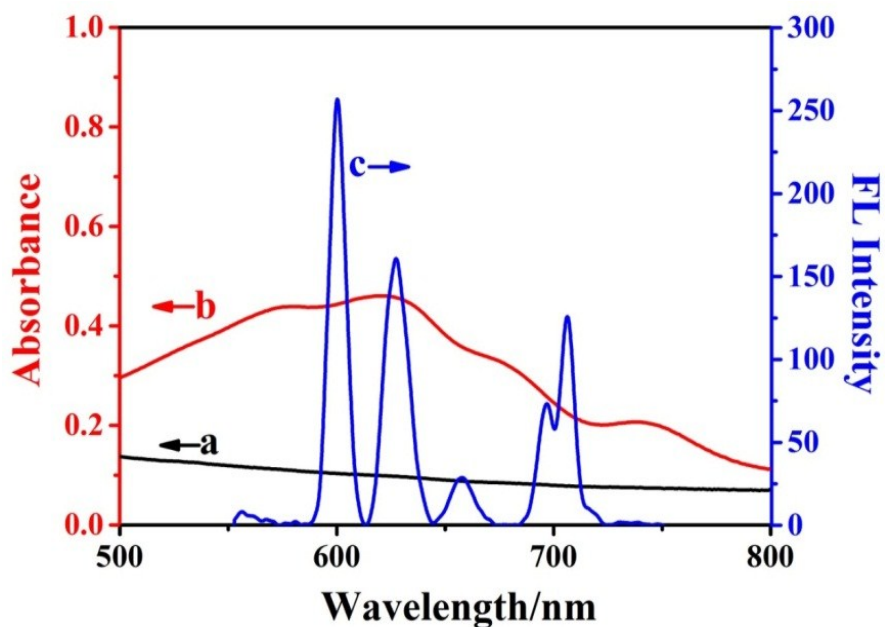

**Figure S9.** Absorption spectra of **1** before (a) and after exposure to UV irradiation (b) and fluorescent spectrum of complex **1** (c).

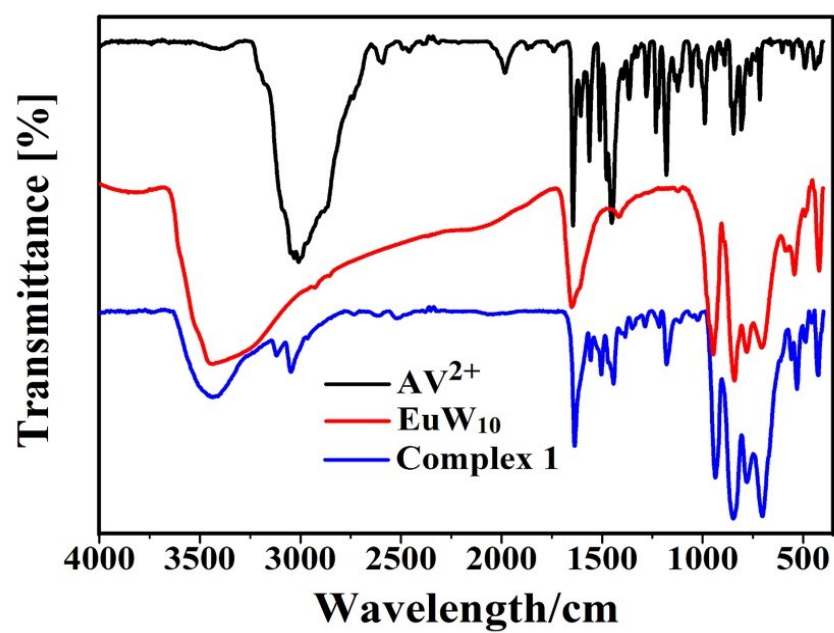

Figure S10 FTIR spectra of AV<sup>2+</sup>, EuW<sub>10</sub> and complex 1.

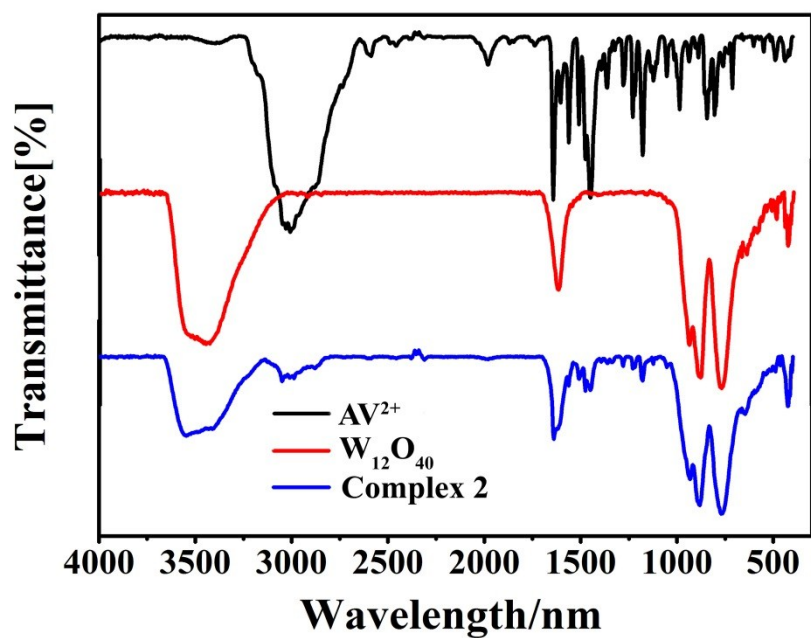

Figure S11 FTIR spectra of AV<sup>2+</sup>, Na<sub>6</sub>[H<sub>2</sub>W<sub>12</sub>O<sub>40</sub>]·20H<sub>2</sub>O and complex 2.

**Table S1.** Crystal Data and Structure Refinements for **1** and **2**.

|                                                        | <b>1</b>                                                                         | <b>2</b>                                                                       |
|--------------------------------------------------------|----------------------------------------------------------------------------------|--------------------------------------------------------------------------------|
| Empirical formula                                      | C <sub>36</sub> H <sub>56</sub> N <sub>7</sub> O <sub>40</sub> EuW <sub>10</sub> | C <sub>16</sub> H <sub>36</sub> N <sub>4</sub> O <sub>45</sub> W <sub>12</sub> |
| Formula weight                                         | 3217.22                                                                          | 3210.55                                                                        |
| Temperature                                            | 293(2) K                                                                         | 293(2) K                                                                       |
| Wavelength                                             | 0.71000 Å                                                                        | 0.71000 Å                                                                      |
| Crystal system                                         | Monoclinic                                                                       | Monoclinic                                                                     |
| Space group                                            | <i>P</i> 21/ <i>n</i>                                                            | <i>P</i> 21/ <i>c</i>                                                          |
| <i>a</i> (Å)                                           | 14.4112(5)                                                                       | 12.0073(7)                                                                     |
| <i>b</i> (Å)                                           | 19.9900(8)                                                                       | 20.1231(15)                                                                    |
| <i>c</i> (Å)                                           | 20.8193(7)                                                                       | 23.5367(16)                                                                    |
| $\alpha$ (deg)                                         | 90                                                                               | 90                                                                             |
| $\beta$ (deg)                                          | 96.156(4)                                                                        | 103.435(6)                                                                     |
| $\gamma$ (deg)                                         | 90                                                                               | 90                                                                             |
| Volume                                                 | 5963.0(4) Å <sup>3</sup>                                                         | 5531.4(6) Å <sup>3</sup>                                                       |
| Z, Calculated density                                  | 4, 3.585 mg/m <sup>3</sup>                                                       | 4, 3.857 mg/m <sup>3</sup>                                                     |
| Absorption coefficient                                 | 20.340 mm <sup>-1</sup>                                                          | 24.941 mm <sup>-1</sup>                                                        |
| F(000)                                                 | 5633                                                                             | 5545                                                                           |
| Crystal size                                           | 0.1 × 0.02 × 0.01 mm                                                             | 0.2 × 0.1 × 0.15 mm                                                            |
| Theta range for data collection                        | 3.37 to 25.50°                                                                   | 3.35 to 26.00°                                                                 |
| Limiting indices                                       | -17 ≤ <i>h</i> ≤ 17, -24 ≤ <i>k</i> ≤ 21, -25 ≤ <i>l</i> ≤ 17                    | -14 ≤ <i>h</i> ≤ 14, -24 ≤ <i>k</i> ≤ 24, -19 ≤ <i>l</i> ≤ 29                  |
| Reflections collected / unique                         | 34241 / 11112<br>[ <i>R</i> <sub>int</sub> = 0.0942]                             | 25982 / 10891<br>[ <i>R</i> <sub>int</sub> = 0.1008]                           |
| Completeness to theta = 25.50                          | 99.8 %                                                                           | 99.8 %                                                                         |
| Absorption correction                                  | Semi-empirical from equivalents                                                  | Semi-empirical from equivalents                                                |
| Max. and min. transmission                             | 1.00000 and 0.56973                                                              | 1.00000 and 0.93287                                                            |
| Refinement method                                      | Full-matrix least-squares on <i>F</i> <sup>2</sup>                               | Full-matrix least-squares on <i>F</i> <sup>2</sup>                             |
| Data / restraints / parameters                         | 11112 / 0 / 601                                                                  | 10891 / 0 / 647                                                                |
| Goodness-of-fit on <i>F</i> <sup>2</sup>               | 1.003                                                                            | 0.956                                                                          |
| Final <i>R</i> indices<br>[ <i>I</i> > 2σ( <i>I</i> )] | <i>R</i> <sub>1</sub> = 0.0545, <i>wR</i> <sub>2</sub> = 0.0920                  | <i>R</i> <sub>1</sub> = 0.0667, <i>wR</i> <sub>2</sub> = 0.0930                |
| <i>R</i> indices (all data)                            | <i>R</i> <sub>1</sub> = 0.1069, <i>wR</i> <sub>2</sub> = 0.1096                  | <i>R</i> <sub>1</sub> = 0.1617, <i>wR</i> <sub>2</sub> = 0.1188                |
| Largest diff. peak and hole                            | 3.442 and -1.820 e.Å <sup>-3</sup>                                               | 1.925 and -1.763 e.Å <sup>-3</sup>                                             |

**Table S2.** Selected bond lengths (Å) and bond angles (°) for **1** and **2**.

| <b>Complex 1</b> |              |               |              |
|------------------|--------------|---------------|--------------|
| Bond             | Distance (Å) | Bond          | Distance (Å) |
| Eu-O(21)         | 2.402(11)    | W(9)-O(28)    | 1.731(13)    |
| Eu-O(17)         | 2.405(12)    | W(9)-O(21)    | 1.771(12)    |
| Eu-O(18)         | 2.408(12)    | W(9)-O(32)    | 2.161(11)    |
| Eu-O(16)         | 2.428(11)    | W(9)-O(27)    | 2.334(11)    |
| Eu-O(22)         | 2.439(11)    | W(10)-O(36)   | 1.752(13)    |
| Eu-O(20)         | 2.445(12)    | W(10)-O(34)   | 1.834(12)    |
| Eu-W(9)          | 3.7783(12)   | W(10)-O(32)   | 2.108(11)    |
| Eu-W(2)          | 3.8261(13)   | W(10)-O(27)   | 2.246(11)    |
| Eu-W(5)          | 3.8347(13)   | C(1)-N(4)     | 1.42(3)      |
| Eu-W(6)          | 3.8376(13)   | C(1)-C(2)     | 1.65(3)      |
| W(1)-O(1)        | 1.732(14)    | C(2)-C(3)     | 1.53(3)      |
| W(1)-O(2)        | 1.842(11)    | C(3)-N(3)     | 1.52(3)      |
| W(1)-O(4)        | 2.126(12)    | C(4)-N(3)     | 1.34(3)      |
| W(1)-O(14)       | 2.243(12)    | C(4)-C(7)     | 1.39(3)      |
| W(2)-O(6)        | 1.734(12)    | C(7)-C(8)     | 1.35(3)      |
| W(2)-O(18)       | 1.765(12)    | C(8)-C(9)     | 1.46(3)      |
| W(2)-O(2)        | 2.075(12)    | C(10)-C(13)   | 1.40(3)      |
| W(2)-O(14)       | 2.379(11)    | C(11)-C(12)   | 1.39(3)      |
| W(3)-O(9)        | 1.696(12)    | C(12)-N(2)    | 1.34(2)      |
| W(3)-O(15)       | 1.777(12)    | C(13)-N(2)    | 1.34(3)      |
| W(3)-O(14)       | 2.317(12)    | C(14)-C(15)   | 1.46(3)      |
| W(4)-O(8)        | 1.739(11)    | C(14)-N(2)    | 1.51(2)      |
| W(4)-O(16)       | 1.785(12)    | C(15)-C(16)   | 1.58(3)      |
| W(4)-O(13)       | 1.931(12)    | C(16)-N(1)    | 1.54(2)      |
| W(4)-O(10)       | 1.941(13)    | C(17)-C(17)#1 | 1.51(4)      |
| W(4)-O(4)        | 2.139(12)    | C(17)-N(5)    | 1.51(3)      |
| W(4)-O(14)       | 2.304(11)    | N(5)-C(18)    | 1.3900       |
| W(4)-W(5)        | 3.2264(11)   | N(5)-C(22)    | 1.3900       |
| W(5)-O(7)        | 1.725(12)    | C(18)-C(19)   | 1.3900       |
| W(5)-O(17)       | 1.773(12)    | C(20)-C(25)   | 1.42(2)      |
| W(5)-O(13)       | 1.933(12)    | C(28)-C(29)   | 1.50(3)      |
| W(5)-O(12)       | 1.943(12)    | C(28)-N(6)    | 1.53(2)      |
| W(5)-O(3)        | 2.039(13)    | C(23)-C(24)   | 1.3900       |
| W(6)-O(31)       | 1.733(13)    | C(23)-N(6)    | 1.3900       |
| W(6)-O(19)       | 1.779(13)    | C(24)-C(25)   | 1.3900       |
| W(6)-O(35)       | 2.053(12)    | C(25)-C(26)   | 1.3900       |
| W(6)-O(27)       | 2.270(11)    | C(26)-C(27)   | 1.3900       |
| W(7)-O(30)       | 1.715(12)    | C(27)-N(6)    | 1.3900       |
| W(7)-O(20)       | 1.744(12)    | C(29)-C(30)   | 1.42(4)      |
| W(7)-O(27)       | 2.335(11)    | C(30)-C(31)   | 1.40(4)      |
| W(8)-O(29)       | 1.740(12)    | C(31)-N(7)    | 1.52(3)      |
| W(8)-O(22)       | 1.751(12)    | N(7)-C(32)    | 1.3900       |
| W(8)-O(23)       | 1.933(12)    | N(7)-C(36)    | 1.3900       |
| W(8)-O(24)       | 1.960(12)    | C(32)-C(33)   | 1.3900       |
| W(8)-O(33)       | 2.063(13)    | C(34)-C(34)#2 | 1.51(3)      |
| W(8)-O(27)       | 2.323(11)    | C(35)-C(36)   | 1.3900       |
| Angle            | (°)          | Angle         | (°)          |



|                |           |                  |          |
|----------------|-----------|------------------|----------|
| O(21)-Eu-O(17) | 77.9(4)   | O(25)-W(6)-O(27) | 76.8(4)  |
| O(21)-Eu-O(19) | 73.8(4)   | O(35)-W(6)-O(27) | 71.9(4)  |
| O(17)-Eu-O(19) | 79.6(4)   | O(31)-W(6)-Eu    | 133.2(4) |
| O(18)-Eu-O(19) | 142.7(4)  | O(19)-W(6)-Eu    | 28.3(4)  |
| O(17)-Eu-O(15) | 112.7(4)  | O(25)-W(6)-Eu    | 85.5(3)  |
| O(18)-Eu-O(15) | 72.9(4)   | O(35)-W(6)-Eu    | 129.9(3) |
| O(19)-Eu-O(15) | 143.0(4)  | O(27)-W(6)-Eu    | 58.0(3)  |
| O(21)-Eu-O(16) | 142.2(4)  | O(30)-W(7)-O(20) | 103.3(6) |
| O(17)-Eu-O(16) | 71.6(4)   | O(20)-W(7)-O(25) | 92.1(5)  |
| O(18)-Eu-O(16) | 115.3(4)  | O(25)-W(7)-O(24) | 152.2(5) |
| O(19)-Eu-O(16) | 79.0(4)   | O(30)-W(7)-O(34) | 96.8(5)  |
| O(17)-Eu-O(22) | 144.4(4)  | O(20)-W(7)-O(34) | 159.8(5) |
| O(18)-Eu-O(22) | 77.8(4)   | O(24)-W(7)-O(34) | 81.4(5)  |
| O(19)-Eu-O(22) | 113.3(4)  | O(30)-W(7)-O(27) | 170.6(5) |
| O(17)-Eu-O(20) | 142.2(4)  | O(20)-W(7)-O(27) | 86.0(5)  |
| O(19)-Eu-O(20) | 72.2(4)   | O(34)-W(7)-O(27) | 73.8(4)  |
| O(22)-Eu-O(20) | 71.7(4)   | O(30)-W(7)-Eu    | 131.6(4) |
| O(21)-Eu-W(9)  | 21.3(3)   | O(20)-W(7)-Eu    | 28.2(4)  |
| O(17)-Eu-W(9)  | 95.3(3)   | O(24)-W(7)-Eu    | 87.8(4)  |
| O(18)-Eu-W(9)  | 92.0(3)   | O(34)-W(7)-Eu    | 131.6(3) |
| O(19)-Eu-W(9)  | 64.8(3)   | O(27)-W(7)-Eu    | 57.8(3)  |
| O(16)-Eu-W(9)  | 143.4(3)  | O(29)-W(8)-O(22) | 103.5(6) |
| O(22)-Eu-W(9)  | 64.7(3)   | O(22)-W(8)-O(23) | 93.7(5)  |
| O(17)-Eu-W(2)  | 64.7(3)   | O(23)-W(8)-O(24) | 152.8(5) |
| O(18)-Eu-W(2)  | 19.9(3)   | O(29)-W(8)-O(33) | 97.9(5)  |
| O(15)-Eu-W(2)  | 64.1(3)   | O(22)-W(8)-O(33) | 158.5(5) |
| O(16)-Eu-W(2)  | 95.4(3)   | O(23)-W(8)-O(33) | 81.5(5)  |
| W(9)-Eu-W(2)   | 109.99(3) | O(24)-W(8)-O(33) | 83.3(5)  |
| O(21)-Eu-W(5)  | 92.9(3)   | O(29)-W(8)-O(27) | 170.6(5) |
| O(17)-Eu-W(5)  | 19.9(3)   | O(22)-W(8)-O(27) | 85.8(5)  |
| O(18)-Eu-W(5)  | 64.6(3)   | O(23)-W(8)-O(27) | 76.7(5)  |
| O(19)-Eu-W(5)  | 96.3(3)   | O(24)-W(8)-O(27) | 77.4(4)  |
| O(15)-Eu-W(5)  | 92.9(3)   | O(33)-W(8)-O(27) | 72.7(4)  |
| O(16)-Eu-W(5)  | 64.2(3)   | O(29)-W(8)-Eu    | 131.5(4) |
| W(9)-Eu-W(5)   | 112.41(3) | O(22)-W(8)-Eu    | 28.0(4)  |
| W(2)-Eu-W(5)   | 50.62(2)  | O(23)-W(8)-Eu    | 85.9(3)  |
| O(21)-Eu-W(6)  | 65.4(3)   | O(27)-W(8)-Eu    | 57.8(3)  |
| O(17)-Eu-W(6)  | 95.9(3)   | O(28)-W(9)-O(21) | 105.4(6) |
| O(18)-Eu-W(6)  | 140.8(3)  | O(28)-W(9)-O(23) | 102.1(5) |
| O(19)-Eu-W(6)  | 20.4(3)   | O(21)-W(9)-O(23) | 95.9(5)  |
| O(16)-Eu-W(6)  | 95.7(3)   | O(23)-W(9)-O(26) | 149.7(5) |
| O(20)-Eu-W(6)  | 64.0(3)   | O(28)-W(9)-O(32) | 92.9(5)  |
| W(9)-Eu-W(6)   | 50.65(2)  | O(21)-W(9)-O(32) | 161.7(5) |
| W(2)-Eu-W(6)   | 153.14(3) | O(23)-W(9)-O(32) | 81.4(5)  |
| W(5)-Eu-W(6)   | 114.35(3) | O(26)-W(9)-O(32) | 79.6(4)  |
| O(1)-W(1)-O(2) | 106.1(6)  | O(28)-W(9)-O(27) | 166.1(5) |
| O(2)-W(1)-O(5) | 92.5(5)   | O(21)-W(9)-O(27) | 88.5(5)  |
| O(1)-W(1)-O(3) | 105.5(6)  | O(26)-W(9)-O(27) | 75.5(5)  |
| O(2)-W(1)-O(3) | 91.9(5)   | O(32)-W(9)-O(27) | 73.2(4)  |
| O(5)-W(1)-O(3) | 151.8(5)  | O(28)-W(9)-Eu    | 134.9(4) |
| O(2)-W(1)-O(4) | 155.7(5)  | O(21)-W(9)-Eu    | 29.6(4)  |

|                  |          |                   |           |
|------------------|----------|-------------------|-----------|
| O(5)-W(1)-O(4)   | 83.0(5)  | O(23)-W(9)-Eu     | 87.8(3)   |
| O(1)-W(1)-O(14)  | 172.7(5) | O(32)-W(9)-Eu     | 132.2(3)  |
| O(2)-W(1)-O(14)  | 81.0(5)  | O(27)-W(9)-Eu     | 59.0(3)   |
| O(5)-W(1)-O(14)  | 77.8(5)  | O(36)-W(10)-O(34) | 104.3(6)  |
| O(6)-W(2)-O(18)  | 104.4(5) | O(34)-W(10)-O(35) | 91.4(5)   |
| O(18)-W(2)-O(12) | 93.7(5)  | O(36)-W(10)-O(33) | 100.9(6)  |
| O(6)-W(2)-O(11)  | 103.3(5) | O(35)-W(10)-O(33) | 152.5(5)  |
| O(18)-W(2)-O(11) | 93.3(5)  | O(36)-W(10)-O(32) | 98.6(5)   |
| O(12)-W(2)-O(11) | 150.0(5) | O(33)-W(10)-O(32) | 83.4(5)   |
| O(6)-W(2)-O(2)   | 95.8(5)  | O(36)-W(10)-O(27) | 174.6(5)  |
| O(18)-W(2)-O(2)  | 159.8(5) | O(34)-W(10)-O(27) | 81.1(5)   |
| O(12)-W(2)-O(2)  | 81.7(5)  | O(35)-W(10)-O(27) | 75.9(5)   |
| O(6)-W(2)-O(14)  | 169.1(5) | O(33)-W(10)-O(27) | 77.8(5)   |
| O(18)-W(2)-O(14) | 86.5(5)  | W(1)-O(2)-W(2)    | 114.6(6)  |
| O(2)-W(2)-O(14)  | 73.3(4)  | W(1)-O(4)-W(4)    | 110.9(5)  |
| O(6)-W(2)-Eu     | 132.1(4) | W(1)-O(5)-W(3)    | 115.0(6)  |
| O(18)-W(2)-Eu    | 27.7(4)  | W(4)-O(13)-W(5)   | 113.2(6)  |
| O(12)-W(2)-Eu    | 86.7(4)  | W(1)-O(14)-W(5)   | 95.7(4)   |
| O(2)-W(2)-Eu     | 132.1(3) | W(1)-O(14)-W(4)   | 101.2(4)  |
| O(14)-W(2)-Eu    | 58.8(3)  | W(5)-O(14)-W(4)   | 89.5(4)   |
| O(9)-W(3)-O(15)  | 104.0(6) | W(1)-O(14)-W(3)   | 94.4(4)   |
| O(15)-W(3)-O(11) | 91.0(5)  | W(5)-O(14)-W(3)   | 169.8(6)  |
| O(9)-W(3)-O(10)  | 102.1(6) | W(4)-O(14)-W(3)   | 89.8(4)   |
| O(15)-W(3)-O(10) | 93.1(5)  | W(1)-O(14)-W(2)   | 91.1(4)   |
| O(11)-W(3)-O(10) | 153.6(5) | W(4)-O(14)-W(2)   | 167.8(6)  |
| O(9)-W(3)-O(5)   | 97.9(6)  | W(3)-O(14)-W(2)   | 89.3(4)   |
| O(15)-W(3)-O(5)  | 158.0(5) | W(4)-O(16)-Eu     | 130.9(6)  |
| O(11)-W(3)-O(5)  | 83.0(5)  | W(2)-O(18)-Eu     | 132.3(6)  |
| O(9)-W(3)-O(14)  | 170.1(5) | W(6)-O(19)-Eu     | 131.4(6)  |
| O(15)-W(3)-O(14) | 85.9(5)  | W(9)-O(21)-Eu     | 129.1(6)  |
| O(5)-W(3)-O(14)  | 72.2(4)  | W(9)-O(23)-W(8)   | 115.5(6)  |
| O(9)-W(3)-Eu     | 131.6(4) | W(7)-O(24)-W(8)   | 114.0(6)  |
| O(15)-W(3)-Eu    | 27.6(4)  | W(10)-O(27)-W(6)  | 95.2(4)   |
| O(11)-W(3)-Eu    | 85.3(4)  | W(10)-O(27)-W(8)  | 93.8(4)   |
| O(10)-W(3)-Eu    | 86.3(4)  | W(6)-O(27)-W(8)   | 171.0(6)  |
| O(8)-W(4)-O(16)  | 104.9(6) | W(10)-O(27)-W(9)  | 100.1(4)  |
| O(16)-W(4)-O(13) | 94.4(5)  | W(6)-O(27)-W(9)   | 90.1(4)   |
| O(8)-W(4)-O(10)  | 99.8(5)  | W(8)-O(27)-W(9)   | 88.9(4)   |
| O(13)-W(4)-O(10) | 153.0(5) | W(9)-O(27)-W(7)   | 167.9(6)  |
| O(16)-W(4)-O(4)  | 160.4(5) | W(10)-O(32)-W(9)  | 110.6(5)  |
| O(13)-W(4)-O(4)  | 81.9(5)  | W(10)-O(33)-W(8)  | 115.2(6)  |
| O(8)-W(4)-O(14)  | 167.8(5) | W(10)-O(34)-W(7)  | 113.3(6)  |
| O(16)-W(4)-O(14) | 87.2(5)  | W(10)-O(35)-W(6)  | 116.7(6)  |
| O(4)-W(4)-O(14)  | 73.2(4)  | N(4)-C(1)-C(2)    | 109.1(18) |
| O(8)-W(4)-W(5)   | 136.6(4) | C(3)-C(2)-C(1)    | 109(2)    |
| O(16)-W(4)-W(5)  | 84.5(4)  | N(3)-C(3)-C(2)    | 104(2)    |
| O(13)-W(4)-W(5)  | 33.4(4)  | N(3)-C(4)-C(7)    | 119(2)    |
| O(10)-W(4)-W(5)  | 122.2(4) | N(3)-C(5)-C(6)    | 123(3)    |
| O(4)-W(4)-W(5)   | 81.9(3)  | C(5)-C(6)-C(8)    | 118(2)    |
| O(14)-W(4)-W(5)  | 45.0(3)  | C(8)-C(7)-C(4)    | 120(2)    |
| O(8)-W(4)-Eu     | 133.4(5) | C(7)-C(8)-C(6)    | 118(2)    |

|                  |          |                     |           |
|------------------|----------|---------------------|-----------|
| O(16)-W(4)-Eu    | 28.5(4)  | C(7)-C(8)-C(9)      | 122.0(19) |
| O(4)-W(4)-Eu     | 131.9(3) | C(10)-C(9)-C(11)    | 115(2)    |
| O(14)-W(4)-Eu    | 58.7(3)  | C(10)-C(9)-C(8)     | 122.7(19) |
| W(5)-W(4)-Eu     | 65.04(2) | C(12)-C(11)-C(9)    | 120.4(19) |
| O(17)-W(5)-O(1)  | 92.4(5)  | N(2)-C(12)-C(11)    | 121.6(19) |
| O(7)-W(5)-O(12)  | 99.9(6)  | C(15)-C(14)-N(2)    | 109.0(16) |
| O(13)-W(5)-O(12) | 154.7(5) | C(14)-C(15)-C(16)   | 107.3(17) |
| O(7)-W(5)-O(3)   | 98.1(6)  | N(1)-C(16)-C(15)    | 104.3(16) |
| O(17)-W(5)-O(3)  | 158.4(5) | C(17)#1-C(17)-N(5)  | 120(2)    |
| O(13)-W(5)-O(3)  | 82.8(5)  | C(18)-N(5)-C(22)    | 120.0     |
| O(12)-W(5)-O(3)  | 82.6(5)  | C(18)-N(5)-C(17)    | 115.1(19) |
| O(7)-W(5)-O(14)  | 170.2(6) | C(22)-N(5)-C(17)    | 123.0(19) |
| O(17)-W(5)-O(14) | 86.3(5)  | N(5)-C(18)-C(19)    | 120.0     |
| O(3)-W(5)-O(14)  | 72.1(5)  | C(19)-C(20)-C(21)   | 120.0     |
| O(7)-W(5)-W(4)   | 135.8(4) | C(19)-C(20)-C(25)   | 116(2)    |
| O(17)-W(5)-W(4)  | 82.5(4)  | C(21)-C(20)-C(25)   | 124(2)    |
| O(13)-W(5)-W(4)  | 33.4(4)  | C(21)-C(22)-N(5)    | 120.0     |
| O(12)-W(5)-W(4)  | 123.6(4) | C(29)-C(28)-N(6)    | 118(2)    |
| O(3)-W(5)-W(4)   | 81.9(4)  | C(24)-C(25)-C(20)   | 119(2)    |
| O(14)-W(5)-W(4)  | 45.6(3)  | C(26)-C(25)-C(20)   | 121(2)    |
| O(17)-W(5)-Eu    | 27.5(4)  | N(6)-C(27)-C(26)    | 120.0     |
| O(13)-W(5)-Eu    | 87.7(4)  | C(27)-N(6)-C(23)    | 120.0     |
| O(12)-W(5)-Eu    | 86.5(4)  | C(27)-N(6)-C(28)    | 109.5(19) |
| O(3)-W(5)-Eu     | 131.0(4) | C(23)-N(6)-C(28)    | 129.4(19) |
| O(14)-W(5)-Eu    | 58.9(3)  | C(30)-C(29)-C(28)   | 126(2)    |
| W(4)-W(5)-Eu     | 65.25(2) | C(30)-C(31)-N(7)    | 118(2)    |
| O(31)-W(6)-O(19) | 104.9(5) | C(36)-N(7)-C(31)    | 117.6(17) |
| O(31)-W(6)-O(26) | 101.5(6) | C(33)-C(32)-N(7)    | 120.0     |
| O(19)-W(6)-O(26) | 93.1(5)  | C(32)-C(33)-C(34)   | 120.0     |
| O(19)-W(6)-O(25) | 91.4(5)  | C(33)-C(34)-C(34)#2 | 107(3)    |
| O(26)-W(6)-O(25) | 153.0(5) | C(35)-C(34)-C(34)#2 | 132(3)    |
| O(31)-W(6)-O(35) | 97.0(5)  | C(35)-C(36)-N(7)    | 120.0     |
| O(19)-W(6)-O(35) | 158.1(5) | C(12)-N(2)-C(13)    | 120.4(19) |
| O(26)-W(6)-O(35) | 82.8(5)  | C(12)-N(2)-C(14)    | 118.5(17) |
| O(31)-W(6)-O(27) | 168.8(5) | C(13)-N(2)-C(14)    | 120.3(19) |
| O(19)-W(6)-O(27) | 86.2(5)  | C(5)-N(3)-C(3)      | 116(2)    |
| O(26)-W(6)-O(27) | 77.0(5)  | C(4)-N(3)-C(3)      | 123(2)    |

Symmetry transformations used to generate equivalent atoms: #1, -x+2,-y+2,-z; #2, -x+2,-y+1,-z.

| Complex 2  |              |             |              |
|------------|--------------|-------------|--------------|
| Bond       | Distance (Å) | Bond        | Distance (Å) |
| W(1)-O(19) | 1.708(16)    | W(9)-O(24)  | 2.177(14)    |
| W(1)-O(22) | 1.898(15)    | W(10)-O(40) | 1.730(16)    |
| W(1)-O(13) | 1.936(15)    | W(10)-O(37) | 1.912(16)    |
| W(1)-O(23) | 2.274(16)    | W(10)-O(33) | 1.947(14)    |
| W(2)-O(12) | 1.732(17)    | W(10)-O(26) | 2.185(14)    |
| W(2)-O(5)  | 1.892(14)    | W(11)-O(38) | 1.699(15)    |
| W(2)-O(21) | 1.954(16)    | W(11)-O(36) | 1.883(17)    |
| W(2)-O(23) | 2.211(14)    | W(11)-O(21) | 1.932(17)    |
| W(3)-O(4)  | 1.744(17)    | W(11)-O(20) | 1.973(19)    |

|                  |            |                  |           |
|------------------|------------|------------------|-----------|
| W(3)-O(9)        | 1.901(13)  | W(11)-O(23)      | 2.217(14) |
| W(3)-O(3)        | 1.952(17)  | W(12)-O(27)      | 1.692(17) |
| W(3)-O(8)        | 2.269(17)  | W(12)-O(15)      | 1.918(15) |
| W(4)-O(1)        | 1.711(16)  | W(12)-O(22)      | 1.932(13) |
| W(4)-O(3)        | 1.892(19)  | W(12)-O(39)      | 1.949(17) |
| W(4)-O(5)        | 1.930(13)  | W(12)-O(26)      | 2.248(16) |
| W(4)-O(7)        | 1.941(17)  | OW3A-OW3B        | 1.64(7)   |
| W(4)-O(8)        | 2.242(15)  | OW4A-OW4B#1      | 1.75(10)  |
| W(5)-O(11)       | 1.717(14)  | OW4B-OW4A#1      | 1.75(10)  |
| W(5)-O(16)       | 1.897(16)  | C(1)-C(2)        | 1.35(5)   |
| W(5)-O(18)       | 1.913(18)  | C(1)-N(1)        | 1.48(4)   |
| W(5)-O(2)        | 1.967(15)  | C(2)-C(3)        | 1.41(4)   |
| W(5)-O(8)        | 2.243(13)  | C(3)-N(2)        | 1.45(3)   |
| W(6)-O(10)       | 1.708(17)  | C(4)-N(2)        | 1.34(4)   |
| W(6)-O(14)       | 1.869(16)  | C(4)-C(7)        | 1.40(4)   |
| W(6)-O(25)       | 1.962(15)  | C(5)-C(6)        | 1.32(4)   |
| W(6)-O(24)       | 2.095(15)  | C(5)-N(2)        | 1.35(3)   |
| W(6)-W(7)        | 3.2186(14) | C(6)-C(8)        | 1.41(4)   |
| W(7)-O(29)       | 1.705(16)  | C(7)-C(8)        | 1.36(3)   |
| W(7)-O(17)       | 1.888(15)  | C(8)-C(9)        | 1.46(3)   |
| W(7)-O(18)       | 1.909(16)  | C(9)-C(10)       | 1.33(3)   |
| W(7)-O(30)       | 1.949(17)  | C(9)-C(11)       | 1.36(4)   |
| W(7)-O(24)       | 2.201(13)  | C(10)-C(13)      | 1.41(3)   |
| W(8)-O(32)       | 1.694(13)  | C(11)-C(12)      | 1.34(4)   |
| W(8)-O(30)       | 1.861(18)  | C(12)-N(3)       | 1.41(3)   |
| W(8)-O(33)       | 1.913(15)  | C(13)-N(3)       | 1.31(3)   |
| W(8)-O(28)       | 1.962(17)  | C(14)-C(15)      | 1.42(3)   |
| W(8)-O(26)       | 2.196(13)  | C(14)-N(3)       | 1.52(3)   |
| W(9)-O(34)       | 1.706(18)  | C(15)-C(16)      | 1.47(3)   |
| W(9)-O(35)       | 1.897(18)  | C(16)-N(4)       | 1.50(3)   |
| W(9)-O(31)       | 1.924(15)  |                  |           |
| Angle            | (°)        | Angle            | (°)       |
| O(19)-W(1)-O(22) | 101.6(7)   | O(16)-W(8)-O(26) | 88.7(5)   |
| O(22)-W(1)-O(9)  | 86.6(6)    | O(28)-W(8)-O(26) | 74.1(5)   |
| O(19)-W(1)-O(20) | 96.3(7)    | O(34)-W(9)-O(35) | 98.7(8)   |
| O(22)-W(1)-O(20) | 90.6(6)    | O(35)-W(9)-O(25) | 162.5(7)  |
| O(9)-W(1)-O(20)  | 161.9(7)   | O(34)-W(9)-O(31) | 97.6(8)   |
| O(22)-W(1)-O(13) | 162.8(6)   | O(35)-W(9)-O(31) | 89.5(6)   |
| O(20)-W(1)-O(13) | 88.7(6)    | O(25)-W(9)-O(31) | 92.8(7)   |
| O(19)-W(1)-O(23) | 166.9(6)   | O(34)-W(9)-O(36) | 99.9(8)   |
| O(9)-W(1)-O(23)  | 86.9(6)    | O(35)-W(9)-O(36) | 85.1(7)   |
| O(13)-W(1)-O(23) | 74.6(6)    | O(31)-W(9)-O(36) | 162.3(7)  |
| O(12)-W(2)-O(5)  | 100.0(8)   | O(34)-W(9)-O(24) | 169.1(8)  |
| O(12)-W(2)-O(21) | 98.3(8)    | O(25)-W(9)-O(24) | 74.9(6)   |
| O(5)-W(2)-O(21)  | 161.5(6)   | O(36)-W(9)-O(24) | 88.4(6)   |
| O(5)-W(2)-O(13)  | 91.7(7)    | O(34)-W(9)-W(6)  | 132.3(7)  |
| O(21)-W(2)-O(13) | 88.4(7)    | O(35)-W(9)-W(6)  | 129.0(4)  |
| O(12)-W(2)-O(14) | 99.3(8)    | O(25)-W(9)-W(6)  | 34.6(4)   |
| O(5)-W(2)-O(14)  | 86.5(7)    | O(31)-W(9)-W(6)  | 82.8(5)   |
| O(13)-W(2)-O(14) | 161.7(6)   | O(36)-W(9)-W(6)  | 87.5(5)   |
| O(12)-W(2)-O(23) | 170.5(7)   | O(24)-W(9)-W(6)  | 40.3(4)   |

|                  |          |                   |          |
|------------------|----------|-------------------|----------|
| O(13)-W(2)-O(23) | 75.7(6)  | O(40)-W(10)-O(37) | 101.8(8) |
| O(14)-W(2)-O(23) | 86.1(6)  | O(40)-W(10)-O(39) | 98.1(9)  |
| O(4)-W(3)-O(9)   | 100.2(7) | O(37)-W(10)-O(39) | 90.2(7)  |
| O(9)-W(3)-O(15)  | 87.1(6)  | O(37)-W(10)-O(35) | 86.9(7)  |
| O(4)-W(3)-O(6)   | 98.3(7)  | O(39)-W(10)-O(35) | 161.7(7) |
| O(9)-W(3)-O(6)   | 161.5(7) | O(40)-W(10)-O(33) | 95.9(8)  |
| O(9)-W(3)-O(3)   | 88.8(7)  | O(37)-W(10)-O(33) | 162.2(6) |
| O(15)-W(3)-O(3)  | 160.8(7) | O(35)-W(10)-O(33) | 87.9(6)  |
| O(4)-W(3)-O(8)   | 169.6(7) | O(40)-W(10)-O(26) | 167.8(7) |
| O(9)-W(3)-O(8)   | 87.3(6)  | O(39)-W(10)-O(26) | 75.9(6)  |
| O(6)-W(3)-O(8)   | 74.3(6)  | O(35)-W(10)-O(26) | 86.0(6)  |
| O(1)-W(4)-O(3)   | 101.3(8) | O(38)-W(11)-O(36) | 103.4(7) |
| O(3)-W(4)-O(2)   | 91.0(7)  | O(38)-W(11)-O(21) | 96.3(8)  |
| O(1)-W(4)-O(5)   | 98.6(7)  | O(36)-W(11)-O(21) | 91.2(7)  |
| O(3)-W(4)-O(5)   | 88.7(7)  | O(37)-W(11)-O(21) | 161.5(6) |
| O(2)-W(4)-O(5)   | 160.7(6) | O(38)-W(11)-O(20) | 94.7(7)  |
| O(3)-W(4)-O(7)   | 159.4(7) | O(37)-W(11)-O(20) | 87.6(7)  |
| O(2)-W(4)-O(7)   | 89.1(7)  | O(21)-W(11)-O(20) | 89.3(7)  |
| O(5)-W(4)-O(7)   | 84.5(7)  | O(38)-W(11)-O(23) | 166.4(7) |
| O(1)-W(4)-O(8)   | 173.5(7) | O(36)-W(11)-O(23) | 86.9(6)  |
| O(2)-W(4)-O(8)   | 74.7(6)  | O(21)-W(11)-O(23) | 74.3(6)  |
| O(5)-W(4)-O(8)   | 86.6(6)  | O(20)-W(11)-O(23) | 75.6(6)  |
| O(11)-W(5)-O(16) | 102.0(7) | O(27)-W(12)-O(28) | 99.0(7)  |
| O(11)-W(5)-O(18) | 100.2(7) | O(27)-W(12)-O(15) | 102.1(7) |
| O(16)-W(5)-O(18) | 87.8(7)  | O(28)-W(12)-O(22) | 160.7(7) |
| O(11)-W(5)-O(6)  | 99.5(7)  | O(15)-W(12)-O(22) | 85.7(6)  |
| O(18)-W(5)-O(6)  | 160.3(5) | O(27)-W(12)-O(39) | 96.3(8)  |
| O(16)-W(5)-O(2)  | 160.2(6) | O(28)-W(12)-O(39) | 90.3(7)  |
| O(18)-W(5)-O(2)  | 87.4(7)  | O(22)-W(12)-O(39) | 88.2(6)  |
| O(11)-W(5)-O(8)  | 168.8(6) | O(27)-W(12)-O(26) | 167.5(6) |
| O(18)-W(5)-O(8)  | 86.4(6)  | O(28)-W(12)-O(26) | 73.9(6)  |
| O(6)-W(5)-O(8)   | 74.0(6)  | O(22)-W(12)-O(26) | 87.2(6)  |
| O(10)-W(6)-O(7)  | 100.6(8) | W(4)-O(2)-W(5)    | 117.3(8) |
| O(14)-W(6)-O(7)  | 88.1(7)  | W(2)-O(5)-W(4)    | 152.1(9) |
| O(10)-W(6)-O(25) | 94.9(8)  | W(6)-O(7)-W(4)    | 150.3(9) |
| O(7)-W(6)-O(25)  | 164.5(7) | W(4)-O(8)-W(5)    | 94.7(6)  |
| O(10)-W(6)-O(17) | 91.7(7)  | W(4)-O(8)-W(3)    | 93.9(5)  |
| O(14)-W(6)-O(17) | 166.7(7) | W(1)-O(13)-W(2)   | 115.4(7) |
| O(7)-W(6)-O(17)  | 88.5(6)  | W(5)-O(16)-W(8)   | 147.7(8) |
| O(14)-W(6)-O(24) | 91.3(7)  | W(7)-O(17)-W(6)   | 111.5(8) |
| O(7)-W(6)-O(24)  | 89.0(6)  | W(1)-O(20)-W(11)  | 115.0(8) |
| O(25)-W(6)-O(24) | 75.9(6)  | W(2)-O(23)-W(11)  | 95.9(5)  |
| O(10)-W(6)-W(9)  | 127.4(6) | W(11)-O(23)-W(1)  | 94.2(6)  |
| O(7)-W(6)-W(9)   | 131.2(5) | W(6)-O(24)-W(9)   | 97.5(5)  |
| O(25)-W(6)-W(9)  | 33.7(5)  | W(9)-O(24)-W(7)   | 96.1(6)  |
| O(17)-W(6)-W(9)  | 82.7(4)  | W(9)-O(25)-W(6)   | 111.7(7) |
| O(24)-W(6)-W(9)  | 42.2(4)  | W(12)-O(28)-W(8)  | 116.5(7) |
| O(10)-W(6)-W(7)  | 124.5(5) | W(8)-O(30)-W(7)   | 153.8(9) |
| O(14)-W(6)-W(7)  | 133.8(6) | W(9)-O(31)-W(7)   | 115.4(9) |
| O(7)-W(6)-W(7)   | 86.9(4)  | W(9)-O(35)-W(10)  | 150.8(9) |
| O(25)-W(6)-W(7)  | 84.5(4)  | W(11)-O(36)-W(9)  | 151.1(9) |

|                  |          |                   |           |
|------------------|----------|-------------------|-----------|
| O(17)-W(6)-W(7)  | 33.1(5)  | W(10)-O(37)-W(11) | 149.4(9)  |
| W(9)-W(6)-W(7)   | 60.82(3) | C(2)-C(1)-N(1)    | 122(4)    |
| O(17)-W(7)-O(18) | 92.4(7)  | C(1)-C(2)-C(3)    | 121(4)    |
| O(29)-W(7)-O(31) | 95.1(7)  | C(2)-C(3)-N(2)    | 111(3)    |
| O(17)-W(7)-O(31) | 90.8(6)  | N(2)-C(4)-C(7)    | 124(3)    |
| O(18)-W(7)-O(31) | 162.4(7) | C(6)-C(5)-N(2)    | 117(3)    |
| O(29)-W(7)-O(30) | 99.6(7)  | C(5)-C(6)-C(8)    | 125(3)    |
| O(18)-W(7)-O(30) | 83.9(7)  | C(8)-C(7)-C(4)    | 116(3)    |
| O(31)-W(7)-O(30) | 87.8(6)  | C(7)-C(8)-C(6)    | 117(3)    |
| O(29)-W(7)-O(24) | 167.1(7) | C(7)-C(8)-C(9)    | 120(3)    |
| O(17)-W(7)-O(24) | 75.6(6)  | C(6)-C(8)-C(9)    | 123(2)    |
| O(18)-W(7)-O(24) | 90.1(6)  | C(10)-C(9)-C(11)  | 115(3)    |
| O(31)-W(7)-O(24) | 74.0(6)  | C(10)-C(9)-C(8)   | 124(3)    |
| O(29)-W(7)-W(6)  | 133.1(6) | C(11)-C(9)-C(8)   | 121(2)    |
| O(17)-W(7)-W(6)  | 35.4(4)  | C(9)-C(10)-C(13)  | 126(3)    |
| O(18)-W(7)-W(6)  | 90.1(4)  | C(12)-C(11)-C(9)  | 122(2)    |
| O(30)-W(7)-W(6)  | 127.0(4) | C(11)-C(12)-N(3)  | 119(3)    |
| O(24)-W(7)-W(6)  | 40.2(4)  | N(3)-C(13)-C(10)  | 115.8(19) |
| O(32)-W(8)-O(30) | 103.0(7) | C(15)-C(14)-N(3)  | 115(2)    |
| O(32)-W(8)-O(33) | 98.5(7)  | C(14)-C(15)-C(16) | 117(3)    |
| O(30)-W(8)-O(33) | 92.3(7)  | C(15)-C(16)-N(4)  | 113(2)    |
| O(30)-W(8)-O(16) | 86.1(7)  | C(4)-N(2)-C(5)    | 120(3)    |
| O(33)-W(8)-O(16) | 162.7(6) | C(4)-N(2)-C(3)    | 120(3)    |
| O(32)-W(8)-O(28) | 96.4(7)  | C(5)-N(2)-C(3)    | 119(3)    |
| O(30)-W(8)-O(28) | 160.2(6) | C(13)-N(3)-C(12)  | 121(2)    |
| O(33)-W(8)-O(28) | 88.7(7)  | C(13)-N(3)-C(14)  | 124.6(19) |
| O(33)-W(8)-O(26) | 74.0(6)  | C(12)-N(3)-C(14)  | 114(2)    |

Symmetry transformations used to generate equivalent atoms: #1, -x+2,-y+1,-z+2.

**Table S3.** Hydrogen bond distances (Å) and angles (°). (D, donor atom; A, acceptor atom) for **1** and **2**.

| <b>Complex 1</b>       |        |          |           |      |
|------------------------|--------|----------|-----------|------|
| D-H···A                | d(D-H) | d(H···A) | d(D···A)  | <DHA |
| N(1)-H(1C)···O(30)#1   | 0.89   | 2.42     | 2.8595(1) | 111  |
| N(1)-H(1D)···Ow(1)     | 0.89   | 2.02     | 2.7656(1) | 141  |
| N(1)-H(1D)···O(30)#1   | 0.89   | 2.56     | 2.8595(1) | 100  |
| N(1)-H(1E)···O(3)      | 0.89   | 1.84     | 2.7205(1) | 172  |
| N(4)-H(4A)···Ow(2)#6   | 0.89   | 1.99     | 2.8728(1) | 171  |
| N(4)-H(4B)···O(5)#6    | 0.89   | 1.99     | 2.8010(1) | 151  |
| N(4)-H(4C)···O(33)#3   | 0.89   | 2.04     | 2.8157(1) | 145  |
| C(1)-H(1B)···O(6)#7    | 0.97   | 2.26     | 3.1174(1) | 147  |
| C(2)-H(2B)···O(26)#2   | 0.97   | 2.48     | 3.3099(1) | 144  |
| C(3)-H(3A)···O(9)#6    | 0.97   | 2.37     | 3.3263(1) | 169  |
| C(3)-H(3B)···O(36)#3   | 0.97   | 2.49     | 3.4105(1) | 158  |
| C(4)-H(4)···O(34)#3    | 0.93   | 2.47     | 3.3635(1) | 160  |
| C(5)-H(5)···O(17)#2    | 0.93   | 2.48     | 3.0747(1) | 122  |
| C(6)-H(6)···O(17)#2    | 0.93   | 2.50     | 3.0730(1) | 120  |
| C(11)-H(11)···O(8)     | 0.93   | 2.51     | 3.1060(1) | 122  |
| C(13)-H(13)···O(29)#1  | 0.93   | 2.50     | 3.2213(1) | 135  |
| C(13)-H(13)···O(6) #2  | 0.93   | 2.45     | 3.1755(1) | 135  |
| C(14)-H(14B)···O(26)#5 | 0.97   | 2.47     | 3.2545(1) | 138  |
| C(14)-H(14B)···O(32)#5 | 0.97   | 2.56     | 3.4533(1) | 152  |
| C(14)-H(14B)···O(35)#5 | 0.97   | 2.40     | 3.1636(1) | 135  |
| C(15)-H(15A)···Ow(1)   | 0.97   | 2.48     | 3.1882(1) | 130  |
| C(16)-H(16A)···O(24)#1 | 0.97   | 2.40     | 3.0442(1) | 124  |
| C(17)-H(17B)···O(22)#1 | 0.97   | 2.37     | 3.2423(1) | 149  |
| C(18)-H(18)···O(23)#2  | 0.93   | 2.04     | 2.6482(1) | 121  |
| C(18)-H(18)···O(29)#2  | 0.93   | 2.55     | 3.4329(1) | 158  |
| C(22)-H(22)···O(22)#1  | 0.93   | 2.17     | 2.9906(1) | 146  |
| C(24)-H(24)···O(28)#2  | 0.93   | 2.11     | 3.0379(1) | 173  |
| C(27)-H(27)···O(16)    | 0.93   | 2.35     | 2.7980(1) | 109  |
| C(27)-H(27)···O(19)    | 0.93   | 2.17     | 3.0504(1) | 158  |
| C(28)-H(28A)···O(16)   | 0.97   | 2.20     | 2.9175(1) | 130  |
| C(28)-H(28A)···O(20)   | 0.97   | 2.53     | 3.3153(1) | 138  |
| C(29)-H(29A)···O(30)#3 | 0.97   | 2.27     | 3.1944(1) | 160  |
| C(29)-H(29B)···N(7)    | 0.97   | 2.58     | 2.9292(1) | 102  |
| C(30)-H(30B)···O(30)   | 0.97   | 2.56     | 3.4433(1) | 152  |
| C(31)-H(31A)···Ow(3)#4 | 0.97   | 2.56     | 3.2020(1) | 124  |
| C(31)-H(31B)···O(7) #4 | 0.97   | 2.38     | 3.3470(1) | 171  |
| C(32)-H(32)···O(25)#3  | 0.93   | 2.35     | 3.2032(1) | 153  |
| C(32)-H(32)···O(34)#3  | 0.93   | 2.48     | 2.9723(1) | 113  |
| C(32)-H(32)···O(35)#3  | 0.93   | 2.47     | 3.2307(1) | 139  |
| C(33)-H(33)···O(36)#3  | 0.93   | 2.46     | 3.3587(1) | 163  |
| C(35)-H(35)···O(36)#5  | 0.93   | 2.34     | 3.2697(1) | 176  |
| C(36)-H(36)···O(10)    | 0.93   | 2.26     | 3.0383(1) | 140  |

Symmetry codes: #1, 3/2-x,1/2+y,1/2-z; #2, -1/2+x,1/2-y,1/2+z; #3, 2-x,-y,1-z; #4, 3/2-x,-1/2+y,1/2-z; #5, -1+x,y,z; #6, 1-x,-y,1-z; #7, x,y,1+z.

| <b>Complex 2</b> |        |          |          |      |
|------------------|--------|----------|----------|------|
| D-H···A          | d(D-H) | d(H···A) | d(D···A) | <DHA |

|                        |      |      |           |     |
|------------------------|------|------|-----------|-----|
| N(1)-H(1C)···O(38)#5   | 0.89 | 2.57 | 3.3151(2) | 142 |
| N(1)-H(1D)···O(15)#3   | 0.89 | 2.56 | 3.4100(3) | 161 |
| N(1)-H(1D)···O(28)#3   | 0.89 | 2.39 | 2.9698(2) | 123 |
| N(1)-H(1E)···O(10)#2   | 0.89 | 2.18 | 3.0468(2) | 164 |
| N(1)-H(1E)···O(17)#2   | 0.89 | 2.36 | 2.9483(2) | 123 |
| N(4)-H(4A)···Ow(2)     | 0.89 | 1.95 | 2.7859(2) | 155 |
| N(4)-H(4B)···O(11)     | 0.89 | 2.15 | 2.9186(2) | 145 |
| N(4)-H(4B)···O(21)#4   | 0.89 | 2.47 | 3.0294(2) | 121 |
| N(4)-H(4C)···O(14)#4   | 0.89 | 2.51 | 3.1031(2) | 125 |
| N(4)-H(4C)···O(25)#4   | 0.89 | 2.52 | 3.3383(2) | 154 |
| C(1)-H(1A)···O(20)#5   | 0.97 | 2.34 | 3.2857(2) | 166 |
| C(1)-H(1B)···O(6)#3    | 0.97 | 2.49 | 3.2833(2) | 139 |
| C(2)-H(2A)···O(25)#2   | 0.97 | 2.59 | 3.5221(3) | 162 |
| C(2)-H(2A)···O(31)#2   | 0.97 | 2.56 | 3.2764(2) | 130 |
| C(3)-H(3B)···Ow(1)#2   | 0.97 | 2.60 | 3.3609(3) | 136 |
| C(4)-H(4)···O(12)#5    | 0.93 | 2.60 | 3.1259(2) | 117 |
| C(4)-H(4)···O(13)#5    | 0.93 | 2.46 | 3.3079(2) | 151 |
| C(5)-H(5)···Ow(1 #2    | 0.93 | 2.30 | 3.1701(2) | 156 |
| C(7)-H(7)···O(12)#5    | 0.93 | 2.42 | 3.0162(2) | 122 |
| C(10)-H(10)···O(4)#1   | 0.93 | 2.48 | 3.0993(2) | 124 |
| C(12)-H(12)···O(34)#4  | 0.93 | 2.35 | 2.9633(2) | 123 |
| C(13)-H(13)···O(29)    | 0.93 | 2.40 | 3.1837(2) | 142 |
| C(13)-H(13)···O(4)#1   | 0.93 | 2.55 | 3.1014(2) | 119 |
| C(14)-H(14A)···O(32)   | 0.97 | 2.58 | 3.1525(2) | 118 |
| C(14)-H(14B)···O(29)   | 0.97 | 2.40 | 3.2407(2) | 145 |
| C(16)-H(16A)···O(19)#1 | 0.97 | 2.44 | 3.4072(3) | 171 |

Symmetry codes: #1, 1-x,-1/2+y,1/2-z; #2, 1-x,-y,-z; #3, x,1/2-y,-1/2+z; #4, 1+x,y,z; #5, 1+x,1/2-y,-1/2+z.
